# Supplementary material for: Profiling the Murine Acute Phase and Inflammatory Responses to African Snake Venom: An Approach to Inform Acute Snakebite Pathology
Source: MDPI journal article supplement (doi:10.3390/toxins14040229), 2022-03-22
Supplement: s1 [file s1]

# Supplementary Materials: Profiling the Murine Acute Phase and Inflammatory Responses to African Snake Venom: An Approach to Inform Acute Snakebite Pathology

Jaffer Alsolaiss, Chloe A. Evans, George O. Oluoch, Nicholas R. Casewell and Robert A. Harrison

**Supplementary Table S1. Prior murine *in vivo* studies of the inflammatory response following dosing with snake venom.** Key: IL-1/-6/-8/-10/-12p70: Interleukin-1/-6/-8/-10/-12p70; TNF- $\alpha$ : Tumour Necrosis Factor- $\alpha$ ; Interferon- $\gamma$ : IFN- $\gamma$ ; TXB<sub>2</sub> /4; Thromboxane B2/4; NO: Nitric Oxide; LTB<sub>4</sub>: Leukotriene B<sub>4</sub>; CCL2: Monocyte Chemotactic Protein-1; COX-2: Cyclooxygenase-2; PGE<sub>2</sub>/D<sub>2</sub>: Prostaglandin E<sub>2</sub>/D<sub>2</sub>; CysLTs: Cysteinyl Leukotriene Receptors.

| Snake species         | Whole venom/venom toxin                                | Target species (Mouse strains) | Inflammatory mediators (time post-envenomation in hours)                                                                                                                                                                                                                    | Observed pathologies                                                                         | Reference |
|-----------------------|--------------------------------------------------------|--------------------------------|-----------------------------------------------------------------------------------------------------------------------------------------------------------------------------------------------------------------------------------------------------------------------------|----------------------------------------------------------------------------------------------|-----------|
| <i>Bothrops asper</i> | Whole venom                                            | Swiss mice                     | Pro-inflammatory cytokines: IL-6 (1-3), TNF- $\alpha$ (1-6)<br>Eicosanoids pathway: LTB <sub>4</sub> (0.5-1), TXB <sub>2</sub> (0.5-1)                                                                                                                                      | Leucocyte infiltrate (neutrophils)                                                           | [1]       |
|                       | Myotoxic PLA <sub>2</sub> , P-I type metalloproteinase | Swiss mice                     | Pro-inflammatory cytokines: IL-1 (1-6), IL-6 (1-6)                                                                                                                                                                                                                          | Not reported                                                                                 | [2]       |
|                       | Whole venom, myotoxic PLA <sub>2</sub> isoform         | Swiss mice                     | Pro-inflammatory cytokines: IL-6 (3-6)                                                                                                                                                                                                                                      | Leucocyte infiltrate (neutrophils, mononuclear cells), reduced platelets, oedema             | [3]       |
|                       | Whole venom                                            | BALB/c mice                    | Pro-inflammatory cytokines: IL-1 (2-24), IL-6 (2-6), IFN- $\gamma$ , TNF- $\alpha$ (2-18)<br>Anti-inflammatory cytokines: IL-10 (4-24)<br>Other: NO (2-24)                                                                                                                  | Not reported                                                                                 | [4]       |
| <i>Bothrops atrox</i> | Whole venom                                            | Swiss mice                     | Pro-inflammatory cytokines: IL-6 (1-4), IL-12p70 (4-8), TNF- $\alpha$ (1)<br>Anti-inflammatory cytokines: IL-10 (8)<br>Chemokines: CCL-2 (1-8)<br>Eicosanoid pathway: COX-2 (1-4), LTB <sub>4</sub> (1), PGD <sub>2</sub> (1), PGE <sub>2</sub> (1-4), TXB <sub>2</sub> (1) | Vascular permeability, leucocyte infiltration (mononuclear and polymorphonuclear leucocytes) | [5]       |
|                       | Whole venom                                            | BALB/c                         | Pro-inflammatory cytokines: IL-6 (1-6), IFN- $\gamma$ (1-12), TNF- $\alpha$ (1-18)                                                                                                                                                                                          | Leucocyte infiltration (polymorphonuclear cells), skeletal muscle                            | [6]       |

|                          |                                       |             |                                                                                                                                                                                                                                                        |                                                                         |       |
|--------------------------|---------------------------------------|-------------|--------------------------------------------------------------------------------------------------------------------------------------------------------------------------------------------------------------------------------------------------------|-------------------------------------------------------------------------|-------|
|                          |                                       |             | <b>Anti-inflammatory</b><br><b>cytokines:</b> IL-10 (1-18)<br><b>Other:</b> NO (1-24)                                                                                                                                                                  | disruption, oedema, erythema, haemorrhage and local tissue necrosis     |       |
|                          |                                       |             | <b>Pro-inflammatory</b><br><b>cytokines:</b> IL-1 $\beta$ (4, P-I metalloprotease only), IL-6 (1-2, PLA <sub>2</sub> ; 2, P-I metalloprotease)                                                                                                         |                                                                         |       |
|                          | P-I metalloprotease, PLA <sub>2</sub> | C57BL/6     | <b>Anti-inflammatory</b><br><b>cytokines:</b> IL-10 (1, PLA <sub>2</sub> ; 1-2, P-I metalloprotease)<br><b>Eicosanoid pathway:</b> CysLTs (1-2, PLA <sub>2</sub> only), LTB <sub>4</sub> (4, PLA <sub>2</sub> only), PGE <sub>2</sub> (4, both toxins) | Leucocyte infiltration (neutrophils, mononuclear cells)                 | [7]   |
|                          |                                       |             | <b>Pro-inflammatory</b><br><b>cytokines:</b> IL-1 $\beta$ (4.5), IL-6 (4.5)                                                                                                                                                                            |                                                                         |       |
|                          | Whole venom                           | C57BL/7     | <b>Anti-inflammatory</b><br><b>cytokines:</b> IL-10 (4.5)<br><b>Chemokines:</b> CCL-2 (4.5)<br><b>Eicosanoid pathway:</b> LTB <sub>4</sub> (4.5), COX-2 (4.5), TXB <sub>2</sub>                                                                        | Leucocyte infiltration (mononuclear and polymorphonuclear leucocytes)   | [5]   |
|                          |                                       |             | <b>Pro-inflammatory</b><br><b>cytokines:</b> IL-1 (4-24), IL-6 (4-18), TNF- $\alpha$ (2-18), IFN- $\gamma$ (2-24)                                                                                                                                      |                                                                         |       |
| <i>Bothrops jararaca</i> | Whole venom                           | BALB/c mice | <b>Anti-inflammatory</b><br><b>cytokines:</b> IL-10 (4-24 hours)                                                                                                                                                                                       | Not reported                                                            | [4,8] |
|                          |                                       |             | <b>Pro-inflammatory</b><br><b>cytokines:</b> IL-1 $\beta$ (4.5), TNF- $\alpha$ (4.5)                                                                                                                                                                   |                                                                         |       |
| <i>Bothrops jararaca</i> | Whole venom                           | Swiss mice  | <b>Eicosanoid pathway:</b> COX-2 (4.5)                                                                                                                                                                                                                 | Leucocyte infiltration (neutrophils), oedema, haemorrhage, and necrosis | [9]   |

**Supplementary Table S2.** The determined median venom lethal dose 50 (LD<sub>50</sub>) doses of the African snake venoms used in this study.

| Snake species                | LD50 doses (µg venom/mouse<br>(18-22g)<br>(95% confidence intervals) | Mice doses selected for<br>analysis (µg venom/mouse<br>(18-22g) | Number of surviving mice<br>from each group used in this<br>study<br>(Overall group size, n=5) |
|------------------------------|----------------------------------------------------------------------|-----------------------------------------------------------------|------------------------------------------------------------------------------------------------|
| <i>Bitis gabonica</i>        | 18.4 (17.4- 19.5)                                                    | 10                                                              | 3                                                                                              |
| <i>Bitis arietans</i>        | 17.7 (17.2- 18.2)                                                    | 15                                                              | 3                                                                                              |
| <i>Echis leucogaster</i>     | 56 (31.1- 100.5)                                                     | 35                                                              | 3                                                                                              |
| <i>Echis ocellatus</i>       | 58 (33.0- 101.9)                                                     | 38                                                              | 2                                                                                              |
| <i>Naja haje</i>             | 6.9 (5.3- 9.0)                                                       | 8                                                               | 2                                                                                              |
| <i>Naja melanoleuca</i>      | 14.5 (13.5- 15.5)                                                    | 13                                                              | 3                                                                                              |
| <i>Naja nigricollis</i>      | 27.5 (25.2- 29.9)                                                    | 24                                                              | 3                                                                                              |
| <i>Dendroaspis polylepis</i> | 11.5 (10.5- 12.5)                                                    | 8                                                               | 3                                                                                              |
| <i>Dendroaspis viridis</i>   | 13.2 (11.7- 14.8)                                                    | 10                                                              | 2                                                                                              |
| <i>Dendroaspis jamesoni</i>  | 54 (46.9- 61.8)                                                      | 42                                                              | 2                                                                                              |

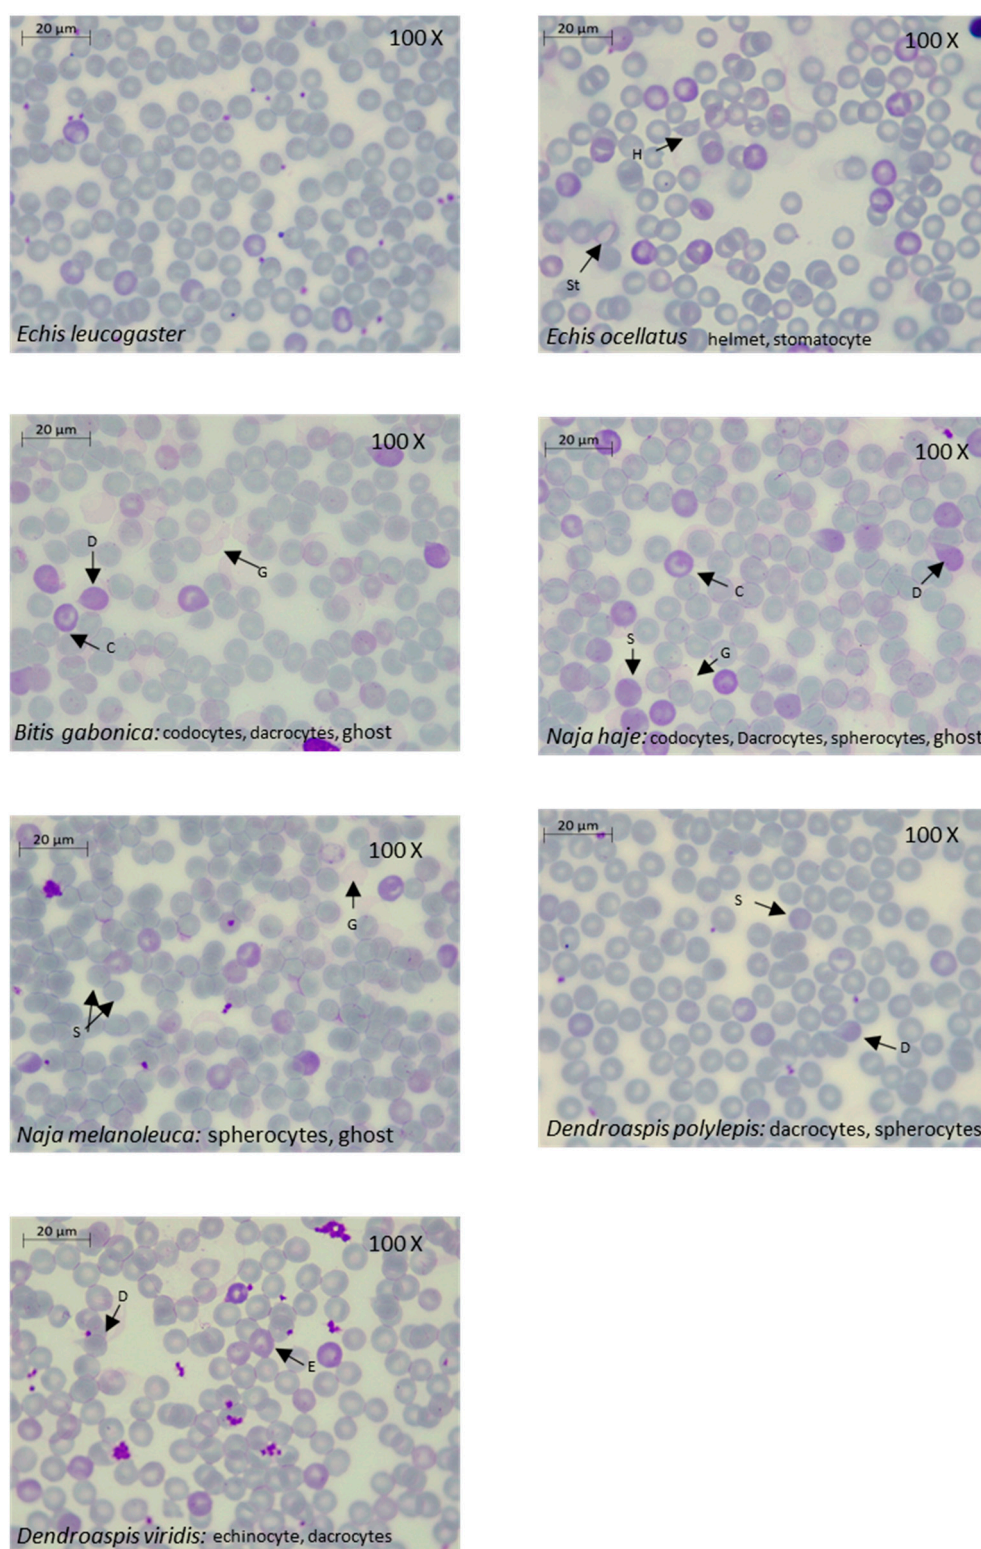

**Supplementary Figure S1.** Representative images of red blood cell morphology (100 × objective) observed in thin blood films of mice injected with different African snake venoms.

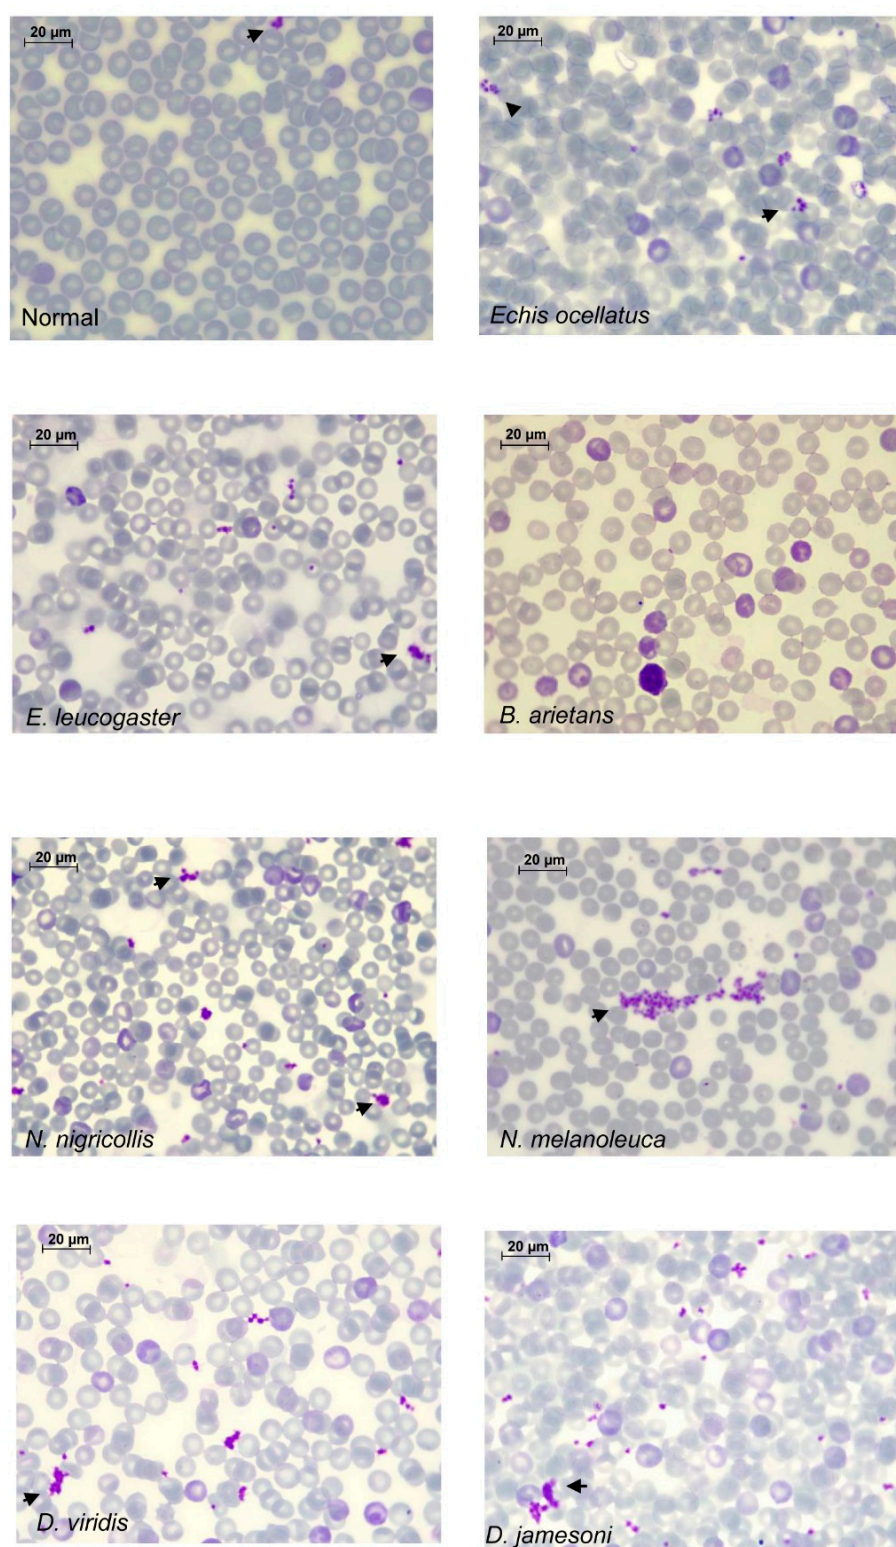

**Supplementary Figure S2.** Examples of platelet aggregation (100 × objective) observed in blood films of mice injected with different venoms. Arrows indicated platelet aggregation colonies compared to the normal blood film control.

1. Zamuner, S.R.; Zuliani, J.P.; Fernandes, C.M.; Gutiérrez, J.M.; de Fátima Pereira Teixeira, C. Inflammation induced by *Bothrops asper* venom: Release of proinflammatory cytokines and eicosanoids, and role of adhesion molecules in leukocyte infiltration. *Toxicon Off. J. Int. Soc. Toxinol.* **2005**, *46*, 806–813.
2. Rucavado, A.; Escalante, T.; Teixeira, C.F.P.; Fernandes, C.M.; Diaz, C.; Gutierrez, J.M. Increments in cytokines and matrix metalloproteinases in skeletal muscle after injection of tissue-damaging toxins from the venom of the snake *Bothrops asper*. *Mediat. Inflamm.* **2002**, *11*, 121–128.
3. Lomonte, B.; Tarkowski, A.; Hanson, L.A. (Eds.) *Host Response to Bothrops asper Snake Venom: Analysis of Edema Formation, Inflammatory Cells, and Cytokine Release in a Mouse Model*; Plenum Publishing Corporation: New York, USA, 1993.
4. Petricevich, V.L.; Teixeira, C.F.P.; Tambourgi, D.V.; Gutiérrez, J.M.A. Increments in serum cytokine and nitric oxide levels in mice injected with *Bothrops asper* and *Bothrops jararaca* snake venoms. *Toxicon* **2000**, *38*, 1253–1266.
5. Moreira, V.; Dos-Santos, M.C.; Nascimento, N.G.; da Silva, H.B.; Fernandes, C.M.; Lima, M.R.D.; Teixeira, C. Local inflammatory events induced by *Bothrops atrox* snake venom and the release of distinct classes of inflammatory mediators. *Toxicon Off. J. Int. Soc. Toxinol.* **2012**, *60*, 12–20.
6. Barros, S.F.; Friedlanskaia, I.; Petricevich, V.L.; Kipnis, T.L. Local inflammation, lethality and cytokine release in mice injected with *Bothrops atrox* venom. *Mediat. Inflamm.* **1998**, *7*, 339–346.
7. Menaldo, D.L.; Bernardes, C.P.; Zoccal, K.F.; Jacob-Ferreira, A.L.; Costa, T.R.; Del Lama, M.P.F.M. Immune cells and mediators involved in the inflammatory responses induced by a P-I metalloprotease and a phospholipase A2 from *Bothrops atrox* venom. *Mol. Immunol.* **2017**, *85*, 238–247.
8. Clissa, P.B.; Laing, G.D.; Theakston, R.D.G.; Mota, I.; Taylor, M.J.; Moura-da-Silva, A.M. The effect of jararhagin, a metalloproteinase from *Bothrops jararaca* venom, on pro-inflammatory cytokines released by murine peritoneal adherent cells. *Toxicon* **2001**, *39*, 1567–1573.
9. Wanderley, C.; Silva, C.; Wong, D.; Ximenes, R.; Morelo, D.; Cosker, F.; Aragão, K.; Fernandes, C.; Palheta-Júnior, R.; Havt, A.; et al. *Bothrops jararacussu* snake venom-induces a local inflammatory response in a prostanoid- and neutrophil-dependent manner. *Toxicon Off. J. Int. Soc. Toxinol.* **2014**, *90*, 134–147.
